# 1 Lipid droplets fuels SARS-CoV-2 replication and inflammatory 2 response

3 Suelen da Silva Gomes Dias<sup>1#</sup>, Vinicius Cardoso Soares<sup>1,2#</sup>, André C. Ferreira<sup>1,3,4</sup>,  
4 Carolina Q. Sacramento<sup>1,3</sup>, Natalia Fintelman-Rodrigues<sup>1,3</sup>, Jairo R. Temerozo<sup>5,6</sup>, Livia  
5 Teixeira<sup>1</sup>, Ester Barreto<sup>1</sup>, Mayara Mattos<sup>1,3</sup>, Caroline S. de Freitas<sup>1,3</sup>, Isaclaudia G.  
6 Azevedo-Quintanilha<sup>1</sup>, Pedro Paulo A. Manso<sup>7</sup>, Eugenio D. Hottz<sup>1,8</sup>, Camila R. R. Pão<sup>1</sup>,  
7 Dumith C. Bou-Habib<sup>5,6</sup>, Fernando A. Bozza<sup>9,10</sup>, Thiago M. L. Souza<sup>1,3</sup>, Patrícia T.  
8 Bozza<sup>1\*</sup>

## 9 # These authors contributed equally to this work

10 1- Laboratory of Immunopharmacology, Oswaldo Cruz Institute (FIOCRUZ), Rio de Janeiro,  
11 RJ, Brazil.

12 2- Program of Immunology and Inflammation, Federal University of Rio de Janeiro, UFRJ, Rio  
13 de Janeiro, RJ, Brazil.

14 3- National Institute for Science and Technology on Innovation on Diseases of Neglected  
15 Populations (INCT/IDNP), Center for Technological Development in Health (CDTS), Fiocruz,  
16 Rio de Janeiro, RJ, Brazil.

17 4- Universidade Iguazu, Nova Iguaçu, RJ, Brazil.

18 5- Laboratory on Thymus Research, Oswaldo Cruz Institute (FIOCRUZ), Rio de Janeiro, RJ,  
19 Brazil.

20 6- National Institute for Science and Technology on Neuroimmunomodulation (INCT/NIM),  
21 Oswaldo Cruz Institute, Fiocruz, Rio de Janeiro, RJ, Brazil.

22 7- Laboratory of Patology, Oswaldo Cruz Institute (FIOCRUZ), Rio de Janeiro, RJ, Brazil.

23 8- Laboratory of Immunothrombosis, Department of Biochemistry, Federal University of Juiz de  
24 Fora (UFJF), Juiz de Fora, MG, Brazil;

25 9- National Institute of Infectology (INI), FIOCRUZ, Rio de Janeiro, Brazil.

26 10- D'Or Institute for Research and Education (IDOR), Rio de Janeiro, Brazil.

27 **Keywords:** SARS-CoV-2; COVID-19; Lipid metabolism; Lipid droplet; Pro-inflammatory  
28 cytokines.

29 \*Corresponding author

30 Patrícia T. Bozza

31 [pbozza@ioc.fiocruz.br](mailto:pbozza@ioc.fiocruz.br) or [pbozza@gmail.com](mailto:pbozza@gmail.com)

32 **Abstract**

33 Viruses are obligate intracellular parasites that make use of the host metabolic  
34 machineries to meet their biosynthetic needs, identifying the host pathways essential for  
35 the virus replication may lead to potential targets for therapeutic intervention. The  
36 mechanisms and pathways explored by SARS-CoV-2 to support its replication within  
37 host cells are not fully known. Lipid droplets (LD) are organelles with major functions in  
38 lipid metabolism and energy homeostasis, and have multiple roles in infections and  
39 inflammation. Here we demonstrate that monocytes from COVID-19 patients have an  
40 increased LD accumulation compared to SARS-CoV-2 negative donors. *In vitro*, SARS-  
41 CoV-2 infection modulates pathways of lipid synthesis and uptake, as CD36, SREBP-1,  
42 PPAR $\gamma$  and DGAT-1 in human monocytes and triggered LD formation in different human  
43 cells. LDs were found in close apposition with SARS-CoV-2 proteins and double-  
44 stranded (ds)-RNA. The pharmacological modulation of LD formation by inhibition of  
45 DGAT-1 with A922500 significantly inhibited SARS-CoV-2 replication as well as  
46 reduced production of pro-inflammatory mediators. Taken together, we demonstrate the  
47 essential role of lipid metabolic reprogramming and LD formation in SARS-CoV-2  
48 replication and pathogenesis, opening new opportunities for therapeutic strategies to  
49 COVID-19.

## 50 **Introduction**

51           The coronavirus disease 2019 (COVID-19) caused by the novel severe acute  
52 respiratory syndrome-coronavirus 2 (SARS-CoV-2) has rapidly spread in a pandemic,  
53 representing an unprecedented health, social and economic threat worldwide (Lu et al.,  
54 2020; Wu et al., 2020). This newly emerged SARS-CoV-2 belongs to the  
55 *Betacoronavirus* genus of the subfamily *Orthocoronavirinae* in the *Coronaviridae*  
56 family. Like other Coronavirus, the SARS-CoV-2 is an enveloped non-segmented  
57 positive-sense RNA (+RNA) virus (Zhu et al., 2020), and its virus genome sequences  
58 have been shown to be similar to the already known SARS-CoV (Zhou et al., 2020b).  
59 Despite the similarity with other members of the *Betacoronavirus* genus, the pathogenesis  
60 of SARS-CoV-2 have unique properties that contribute to its severity and pandemic-scale  
61 spread. Therefore, it is necessary to understand how the virus interacts and manipulate  
62 host cell metabolism to better develop strategies to combat this new coronavirus  
63 pandemic.

64           Viruses are obligated intracellular pathogens and require host cell machinery to  
65 replicate (Chazal and Gerlier, 2003; Novoa et al., 2005; Takahashi and Suzuki, 2011).  
66 Viruses interact with several intracellular structures and have the ability to modulate  
67 cellular metabolism with benefit for viral replication (Abrantes et al., 2012; Syed et al.,  
68 2010; Zhang et al., 2017). Accumulate evidence point to major roles of lipid droplets  
69 (LD) for virus life cycle and pathogenesis, highlighting attention to its potential as target  
70 for drug development. Studies have demonstrated the interaction of viral proteins with  
71 proteins related to LD and the relevance of this organelle for viral replication as already  
72 demonstrated in several positive strand RNA (+ RNA) viruses such as *Flaviviridae*  
73 members, rotavirus and reovirus (Cheung et al., 2010; Coffey et al., 2006; Filipe and  
74 McLauchlan, 2015; Lyn et al., 2013; Samsa et al., 2009; Villareal et al., 2015).  
75 Accordingly, enzymes associated with lipid metabolism and pharmacological  
76 interventions that alter the formation of LDs and the synthesis of fatty acids reduces viral  
77 replication and assembly (Herker et al., 2010; Martín-Acebes et al., 2011; Villareal et al.,  
78 2015; Yang et al., 2008; Zhang et al., 2017). In addition, LD plays an important role in  
79 the infection pathogenesis and inflammatory processes (Herker and Ott, 2012; Pereira-  
80 Dutra et al., 2019).

81           Here we demonstrate major effects of SARS-CoV-2 to modulate lipid metabolism  
82 in human cells favoring increased de novo lipid synthesis and lipid remodeling, leading  
83 to increased LD accumulation in human cells. Increased LD accumulation is also  
84 observed in monocytes from COVID-19 patients when compared to healthy volunteers.  
85 Importantly, blocking LD biogenesis with the pharmacological inhibitor of DGAT-1  
86 (A922500) blocks viral replication, pro-inflammatory cytokine production and cell death.  
87 Collectively, our results uncover mechanisms of viral manipulation of host cell lipid  
88 metabolism to allow SARS-CoV-2 replication and provide new ideas for antiviral  
89 strategy.

90

## 91 **Results**

### 92 **SARS-CoV-2 infection upregulates lipid metabolism, increasing LD biogenesis in** 93 **human cells.**

94 Viruses have the ability to modulate cellular metabolism with benefits for viral  
95 replication. Several +RNA viruses, including various members of *Flaviviridae* family, as  
96 HCV (Boulant et al., 2007; Lyn et al., 2013) and DENV (Carvalho et al., 2012; Samsa et  
97 al., 2009) and also reovirus (Coffey et al., 2006), and poliovirus (Viktorova et al., 2018),  
98 modify the lipid metabolism in different cells and trigger LD formation, using these host  
99 organelles at different steps of their own replicative cycle,.

100 Here, we demonstrated increased LD accumulation in human monocytes from  
101 COVID-19 patients when compared with healthy volunteers (Fig. 1A and B). Likewise,  
102 we demonstrated that in vitro infection with SARS-CoV-2 at MOI of 0.01 triggers the  
103 increase of LDs in primary human monocytes within 24 hours (Fig. 1C and D), as well  
104 as in a lung epithelial human cell line (A549) (Supplementary Fig. 1A and B), and lung  
105 microvascular endothelial human cell line (HMVEC-L) (Supplementary Fig. 1C and D)  
106 after 48 hours of infection.

107 Lipid metabolism alterations in cells and plasma are emerging as major  
108 phenotypes during COVID-19 and SARS-CoV-2 infection (Shen et al., 2020). To gain  
109 insights on the mechanisms involved in LD formation, we evaluated the expression of the  
110 proteins associated with lipid metabolism important for lipid uptake and de novo lipid  
111 synthesis (Fig. 1E). As shown in figure 1E-G, SARS-CoV-2 infection induces the  
112 increase of pathways involved in lipid uptake as CD36, the major transcriptional factors  
113 involved in lipogenesis, PPAR $\gamma$  and SREBP-1, and DGAT-1 involved in triacylglycerol  
114 synthesis in human primary monocytes after 24 hours of infection.

115 Altogether, these data suggest that SARS-CoV-2 is able to modulate multiple  
116 pathways of lipid metabolism and remodeling, including immune cells from COVID-19  
117 patients, culminating in new LD assembling in human cells.

### 118 **Inhibition of LD formation lead to decreased viral replication and cell death in** 119 **SARS-CoV-2 infected monocytes.**

120 DGAT-1 is a key protein involved in the final step of triacylglycerol synthesis and  
121 thus is central to remodel and finish the biogenesis of LDs (Chitraju et al., 2017) . During  
122 HCV infection, DGAT-1 was shown to be required for LD biogenesis, and to control

123 HCV protein trafficking to LD (Camus et al., 2013). Consequently, DGAT-1 inhibition  
124 blocks HCV use of LD as replication platform and inhibits viral particle formation  
125 (Camus et al., 2013; Herker et al., 2010). To assess the importance of DGAT-1 to LD  
126 biogenesis during the SARS-CoV-2 infection, we pre-treated A549 cells with A922500,  
127 an inhibitor of the enzyme DGAT-1, for 2 hours at different concentrations and evaluated  
128 the LD biogenesis after 48 hours of SARS-CoV-2 infection. As shown in figure 2A and  
129 B, treatment with A922500 inhibited dose dependently the LD formation triggered by  
130 SARS-CoV-2 infection. Similarly, pre-treatment with A922500 also blocked LD induced  
131 by SARS-CoV-2 in monocytes (Fig. 2A and C).

132 Human monocytes infected with SARS-CoV-2 were shown to sustain genome  
133 viral replication, express higher level of pro-inflammatory cytokine and may undergo cell  
134 death (Codo et al., 2020). To gain insights on the functions of LDs in SARS-CoV-2  
135 infection, LD biogenesis was inhibited by A922500, DGAT-1 inhibitor. Treatment with  
136 A922500 significantly reduced the viral load in human primary monocytes (Fig. 3A),  
137 suggesting a role for DGAT-1 and LD in SARS-CoV-2 replication.

138 It has already been demonstrated the capacity of the SARS-CoV-2 infection to  
139 induce cell death in monocytes, measured by the release of LDH in the supernatant  
140 (Fintelman-Rodrigues et al., 2020). Cell death after infection can occur due to cellular  
141 dysfunctions that lead to changes in cellular homeostasis caused by the virus replication  
142 and/or by the heightened inflammatory response. The cell death in human primary  
143 monocytes infected with SARS-CoV-2 was measured by the release of LDH into the  
144 supernatant, and also by the analysis of cell morphology observed in phase contrast. Our  
145 data showed that SARS-CoV-2 triggered increased LDH release in the supernatant and  
146 infected cells exhibited morphologic alterations with membrane rupture/damage in  
147 comparison with uninfected cells compatible with necrosis (Fig. 3B and C). The treatment  
148 with 10  $\mu$ M of A922500 was able to inhibit SARS-CoV-2 induced cell death (Fig. 3B and  
149 C).

## 150 **Lipid droplets are involved in SARS-CoV-2 heightened inflammatory response**

151 Dysregulated immune response, with increased pro-inflammatory  
152 cytokine/chemokine production is observed during severe COVID-19 infection and  
153 associate with the outcome of the disease (Coperchini et al., 2020). We observed that  
154 primary human monocytes infected with SARS-CoV-2 exhibit increased production of  
155 leukotrienes, pro-inflammatory cytokines (IL-6, TNF $\alpha$  and IL-12) and chemokines (IL-8

156 and CXCL10) in comparison with uninfected monocytes (Fig. 3D, E and F). SARS-CoV-  
157 2 infection increased IL-10 and reduced IL-4 production in comparison with uninfected  
158 monocytes (Fig. 3F).

159 In leukocytes and other cells of the immune response, LDs are organelles with  
160 major functions in inflammatory mediator production and innate signaling. To evaluate  
161 if LDs contribute to SARS-CoV-2-induced inflammation, monocytes were pre-treated  
162 with A922500, and lipid mediators, cytokine and chemokines levels were measured 24 h  
163 after infection. It has been well established that LDs are organelles that compartmentalize  
164 eicosanoids synthesis machinery and are sites for eicosanoid formation (Bozza et al.,  
165 2011). Here, we demonstrated that SARS-CoV-2 infection increased LTB<sub>4</sub> and cysLT  
166 production in comparison with uninfected monocytes (Fig 3D). The pretreatment with  
167 DGAT-1 inhibitor A922500 reduced the LTB<sub>4</sub> and cysLT synthesis. This data  
168 demonstrate the importance of LD to the production of these pro-inflammatory lipid  
169 mediators. We observed that A922500 downregulated the chemokines IL-8 and CXCL10,  
170 and the pro-inflammatory cytokines IL-6, TNF $\alpha$  and IL-12 (Fig. 3E and F), but did not  
171 affect the anti-inflammatory cytokine IL-10 (Fig. 3G). Moreover, the inhibition of LDs  
172 may revert the pro-inflammatory profile by the increase of anti-inflammatory cytokine  
173 IL-4 (Fig. 3G).

174 Altogether, our data indicate that LDs have important functions in the modulation  
175 of inflammatory production in monocytes and suggest that LD inhibition may reduce the  
176 exaggerated inflammatory process caused by the cytokine storm.

### 177 **Lipid droplets are sites for SARS-CoV-2 replication.**

178 The up regulation of the lipid metabolism and LD biogenesis by the new SARS-  
179 CoV-2 suggest that the virus may explore host metabolism to favor its replication using  
180 the LDs as a replication platform, as demonstrated for HCV (Boulant et al., 2007; Camus  
181 et al., 2013; Lee et al., 2019) and DENV (Samsa et al., 2009). To evaluate this, we used  
182 a VERO E6 cell line that has a highly replicative capacity.

183 For these experiments, we pre-treated the VERO cells with a range of  
184 concentrations of DGAT-1 inhibitor A922500 (0.1 - 50  $\mu$ M) for 2 hours, followed by  
185 infection with SARS-CoV-2 (MOI 0.01) for 24 hours. The supernatant was used to  
186 perform a plaque assay. Here, we observed that A922500 significantly inhibited SARS-  
187 CoV-2 replication in a dose dependent manner with an IC<sub>50</sub> of 3.78  $\mu$ M (Fig. 4A and B).

188 To gain insights on the interaction of the SARS-CoV-2 with LDs we labeled the  
189 virus using serum from convalescent COVID-19 patient that exhibit high anti-SARS-  
190 CoV-2 titers. For that, we stained the LDs using a BODIPY probe and analyzed the co-  
191 localization between the virus and LDs by confocal microscopy. As shown in figure 4C,  
192 Intense immunoreactivity (red) was obtained in SARS-CoV-2 infected cells, whereas no  
193 labeling was observed in uninfected cells indicative of specific SARS-CoV-2 labeling  
194 with serum from convalescent COVID-19 (Fig. 4C). As observed for monocytes and lung  
195 cells, Vero E6 infected cells increased LD biogenesis (green). Then, we examined the  
196 spatial relationship between SARS-CoV-2 and LDs. Our confocal analysis show a close  
197 apposition of SARS-CoV-2 immunoreactivity with BODIPY-labeled LDs (red arrows)  
198 and also co-localization of viral protein(s) with BODIPY-labeled LDs (yellow; fuchsia  
199 arrows) in the infected cells (Fig. 4C-D).

200 Accumulating evidence indicate that host LDs play an important role in virus  
201 cycle, including as hubs for viral genome replication and viral particle assembly  
202 (Laufman et al., 2019; Lee et al., 2019; Miyanari et al., 2007; Samsa et al., 2009) . To  
203 access if LDs is associated with SARS-CoV-2 replication, we use a specific antibody for  
204 double stranded (ds)-RNA (J2 clone). As shown in figure 4E, we observed strong labeling  
205 of the ds-RNA in the cells infected with the SARS-CoV-2 compared to uninfected cell.  
206 Similar to labeling of the polyclonal serum from convalescent COVID-19, we observed  
207 close apposition and/or co-localization between BODIPY-labeled LD and ds-RNA (Fig.  
208 4E and E`).

209 Collectively, our data suggest that SARS-CoV-2 uses LDs as a replication  
210 platform, and establish that pharmacological targeting of LD formation inhibit SARS-  
211 CoV-2 replication, emerging as a potential strategy for antiviral development.

212



## 213 Discussion

214 Most positive-strand RNA virus are able to modulate the host lipid metabolism  
215 and to hijack LDs to enhance their fitness and replication/particle assembling capacity  
216 (Herker and Ott, 2012; Pereira-Dutra et al., 2019). The pathways and mechanisms used  
217 may vary according to the virus and the host cell infected. The mechanisms and pathways  
218 explored by SARS-CoV-2 to support its replication within host cells are still largely  
219 unknown. Here we provided evidence that LDs participate at two levels of host pathogen  
220 interaction in SARS-CoV-2 infection: first, they are important players for virus  
221 replication; and second, they are central cell organelles in the amplification of  
222 inflammatory mediator production. First, we demonstrated that SARS-CoV-2 modulates  
223 pathways of lipid uptake and lipogenesis leading to increased LD accumulation in human  
224 host cells. We further showed that LDs are in close proximity with SARS-CoV-2  
225 suggestive that LDs are recruited as part of replication compartment. Second, we showed  
226 that inhibition of DGAT-1 blocked LD biogenesis, and reduced virus replication, cell-  
227 death and pro-inflammatory mediator production.

228 LD biogenesis is a multi-mediated and highly coordinated cellular process that  
229 requires new lipid synthesis and/or lipid uptake and remodeling, but the molecular  
230 mechanisms involved in LD formation during inflammation and infection are still not  
231 completely understood. Here, we showed the increased expression of SREBP-1 and the  
232 nuclear receptor PPAR $\gamma$  after SARS-CoV-2 infection indicative of reprogramming of  
233 cells towards a lipogenic phenotype. Accordingly, increased expression of SREBP-1 has  
234 been reported after respiratory viruses including MERS-CoV, SARS-CoV, was shown  
235 important to the increase of the LD and the accumulation of the cholesterol during the  
236 infection and targeting the SREBP-associated lipid biosynthetic pathways were shown to  
237 have antiviral properties (Yuan et al., 2019). The transcription factor PPAR $\gamma$  is activated  
238 by lipid ligands and promotes the expression of proteins involved in lipid homeostasis  
239 and LD biogenesis, and has been implicated in infectious and non-infectious LD  
240 biogenesis in monocytes/macrophages (Almeida et al., 2014; Souza-Moreira et al., 2019).  
241 Based on this data we can suggest the importance of these two transcription factors during  
242 SARS-CoV-2 infection favoring the lipid synthesis and LD formation. One important  
243 gene up regulated by PPAR $\gamma$  is the membrane receptor CD36 (Cheng et al., 2016). CD36  
244 plays an important role in the transport and uptake of long-chain fatty acids into cells and  
245 participates in pathological process, such as metabolic disorders and infections (Febbraio

246 et al., 2001). Previous reports showed that CD36 levels are increased in HCV and HIV-1  
247 (Berre et al., 2013; Meroni et al., 2005) infection and it facilitates the viral attachment on  
248 host cell membrane contributing to viral replication (Cheng et al., 2016). Our results  
249 demonstrated that SARS-CoV-2 infection increase the CD36 expression in monocytes,  
250 suggesting the increase of lipids uptake can contribute to LD formation, observed after  
251 the infection.

252 Numerous studies established LDs as key organelles during +RNA viruses life  
253 cycle (Herker and Ott, 2012). Here, we observed strong labeling of the SARS-CoV-2  
254 proteins and ds-RNA intimately associated to the LD and in some cases colocalizing with  
255 LD. This fact highly suggests that SARS-CoV-2 recruits LDs to replication compartments  
256 and could use it as building blocks to fuel replication. Indeed, recent studies have shed  
257 light on active mechanisms of LD recruitment to viral replication compartments with bi-  
258 directional content exchange and essential functions to replication and virus particle  
259 assembly (Laufman et al., 2019; Lee et al., 2019).

260 DGAT-1, the key enzyme for triacylglycerol synthesis, is critical for LD  
261 biogenesis and mediate viral protein trafficking to LD by HCV and other virus. Moreover,  
262 pharmacologically suppress of DGAT1 activity inhibits HCV replication at the assembly  
263 step (Camus et al., 2013; Herker et al., 2010). We observed DGAT-1 expression increases  
264 after SARS-CoV-2 infection and this enzyme can contribute for the LD remodeling in the  
265 host cells. Pharmacological inhibitors of lipid metabolism protein are able to modulate  
266 the LD formation. Therefore, we used the DGAT-1 inhibitor (A22500) during SARS-  
267 CoV-2 infection and we observed this treatment reduced the LD biogenesis in monocytes  
268 and A549 cells as well as decrease the viral load of SARS-CoV-2 in monocytes.  
269 Importantly, pharmacologically suppressing DGAT1 activity inhibited dose dependently  
270 SARS-CoV-2 infectious particle formation in VERO E6 cells with an IC<sub>50</sub> of 3.78  $\mu$ M.  
271 Thus, suggesting that DGAT-1 activity and LD formation are crucial to SARS-CoV-2  
272 replication and assembly in these cells.

273 Dysregulated monocyte responses are pivotal in the uncontrolled production of  
274 cytokines during the infection with respiratory viruses, such as influenza A virus (Gao et  
275 al., 2013; Peschke et al., 1993). Dysregulated immune response with key involvement of  
276 monocytes, with increased pro-inflammatory cytokine/chemokine production is also  
277 observed during severe COVID-19 and is associated with the outcome of the disease  
278 (Coperchini et al., 2020; Zhou et al., 2020a). SARS-CoV-2 infection of human monocytes  
279 in vitro recapitulate most of the pattern of inflammatory mediator production associated

280 with COVID-19 severity, including the enhancement of the IL-6 and TNF $\alpha$  levels, and  
281 the consistent cell death, measured by LDH release (Fintelman-Rodrigues et al., 2020;  
282 Temerozo et al., 2020; Zhou et al., 2020a). We showed the SARS-CoV-2 infection was  
283 able to generate a large amount of inflammatory lipid mediators, and cytokine synthesis  
284 by monocytes. Blockage of DGAT-1 activity lead to inhibition of the LDs and  
285 significantly reduced leukotriene production and cytokine released by monocytes,  
286 suggesting an important role for LDs to control the inflammatory process, and  
287 consequently to prevent the cell death-related with the uncontrolled inflammatory  
288 process. This finding is in agreement with the well-established role of LDs in  
289 inflammation and innate immunity (Bozza and Viola, 2010; Pereira-Dutra et al., 2019).  
290 Therefore, our data support a role for LD in the heightened inflammatory production  
291 triggered by SARS-CoV-2 and conversely, inhibition of LD biogenesis by targeting  
292 DGAT1 activity may have beneficial effects in disease pathogenesis.

293 In summary, our data demonstrate that SARS-CoV-2 triggers reprogramming of  
294 lipid metabolism in monocytes and other cells leading to accumulation of LDs favoring  
295 virus replication. The inhibition of LD biogenesis modulates the viral replication and the  
296 pro-inflammatory mediator production. Therefore, our data support the hypothesis that  
297 SARS-CoV-2 infection increases the expression of the lipid metabolism-related protein  
298 for their own benefit towards replication and fitness. Although, further studies are  
299 certainly necessary to better characterize the full mechanisms and importance of the LDs  
300 during the SARS-CoV-2 infection, our findings support major roles for LDs in SARS-  
301 CoV-2 life cycle and immune response. Moreover, the finding that the host lipid  
302 metabolism and LDs are required for SARS-CoV-2 replication suggests a potential  
303 strategy to interfere with SARS-CoV-2 replication by blocking the DGAT1 and other  
304 lipid metabolic pathway enzymes.

305

## 306 **Acknowledgments**

307 We thank the Hemotherapy Service from Hospital Clementino Fraga Filho  
308 (Federal University of Rio de Janeiro, Brazil) for providing buffy-coats. The authors  
309 thank the confocal imaging facility from the Rede de Plataformas Tecnológicas  
310 FIOCRUZ and Dr. Carmen Beatriz Wagner Giacoia Gripp for assessments related to  
311 BSL3 facility. This work was supported by grants from Inova program Fiocruz, Fundação  
312 de Amparo à Pesquisa do Estado do Rio de Janeiro (FAPERJ), Conselho Nacional de  
313 Desenvolvimento Científico e Tecnológico (CNPq) and Coordenação de  
314 Aperfeiçoamento de Pessoal de Nível Superior (CAPES) granted for Patrícia T. Bozza,  
315 Thiago Moreno L. Souza, Fernando A. Bozza.

## 316 **Author Contribution.**

317 Conceived the study: SSGD, VCS, FAB, TMLS, PTB; Designed the experiments: SSGD,  
318 VCS, TMLS; PTB; Performed the experiments: SSGD, VCS, ACF, CQS, NFR, JRT, LT,  
319 EB, MM, CSF, IGAQ, PPM, EH, CRRP; Analyzed the data: SSGD, VCS, DCBH, TMLS,  
320 PTB; Wrote the paper: SSGD, VCS, TMLS, PTB. All authors reviewed and approved the  
321 manuscript.

322 The authors declare no competing financial interests.

323

## 324 **Figure Legends**

### 325 **Fig 1. SARS-CoV-2 infection modulates the lipid metabolism in human monocytes.**

326 (A and C) LDs were captured by fluorescent microscopy after Oil Red O staining (Red)  
327 and nuclei stained with DAPI (Blue).

328 (A) Images representatives of monocytes from COVID-19 patients and health volunteers.

329 (C) Images representatives of human monocytes obtained from PBMC were infected by  
330 SARS-CoV-2 with MOI of 0.01 for 24 hours. Scale bar 20 $\mu$ m.

331 (B and D) LDs were evaluated by ImageJ software analysis by the measurement of the  
332 fluorescent area.

333 (E) Representative scheme of the increase of proteins associated with lipid metabolism  
334 by SARS-CoV-2 infection in monocyte can regulate the lipid droplet formation.

335 (F) Monocytes were infected by SARS-CoV-2 with MOI of 0.01 during 24h. Cell lysates  
336 were collected for the detection of CD36, PPAR- $\gamma$ , SREBP-1, DGAT-1 by Western  
337 blotting.  $\beta$ -actin level were used for control of protein loading.

338 (G) Densitometry data set of each protein.

339 Data are expressed as mean  $\pm$  SEM of five healthy volunteers (HV) for ex vivo  
340 experiments and three healthy donors for LDs staining and western blot. \* $p < 0.05$  versus  
341 health volunteers or uninfected cells.

342 **Fig 2. The A922500 inhibits lipid droplet biogenesis induced by SARS-CoV-2 in**  
343 **human pulmonary cells and monocytes.**

344 Human pulmonary cell (A549 cell line) and monocytes were pre-treated with DGAT-1  
345 inhibitor A922500 for 2 hours before the infection with SARS-CoV-2 at MOI of 0.01  
346 during 24h in monocytes and 48h in A549 cell line.

347 (A) LDs were captured by fluorescent microscopy after Oil Red O staining (Red) and  
348 nuclei stained with DAPI (Blue). Scale bar 20 $\mu$ m.

349 (B and C) LDs were evaluated by ImageJ software analysis by the measurement of the  
350 fluorescent area of (B) A549 pre-treated with A922500 using different concentrations  
351 (0.1, 1 and 10 $\mu$ M) and (C) LDs from monocytes pre-treated with A922500 (10 $\mu$ M).

352 Data are expressed as mean  $\pm$  SEM obtained in four independent experiments or donors.  
353 \* $p < 0.05$  versus uninfected cells and # $p < 0.05$  versus A922500 treated cells.

354 **Fig 3. Inhibitor A922500 decreases the pro-inflammatory profile and cell death**  
355 **induced by SARS-CoV-2 infection and reduces the viral load in human monocyte.**

356 Monocytes were pre-treated with DGAT-1 inhibitor A922500 (10 $\mu$ M) for 2 hours before  
357 the infection with SARS-CoV-2 with MOI of 0.01 during 24h.

358 (A) Cell death was measured in the supernatant by LDH activity fold change in relation  
359 to the uninfected cell.

360 (B) Viral load by qPCR. Monocytes of each sample were counted for normalization.

361 (C) Images of phase contrast from monocytes. Scale bar 20 $\mu$ m.

362 (D-G) The inflammatory cytokines were measured in supernatants by ELISA (D)  
363 leukotrienes: CysLT and LTB<sub>4</sub>, (E) chemokines: IL-8 and CXCL-10, (F) pro-  
364 inflammatory: IL-6, TNF- $\alpha$  and IL-12 and (G) anti-inflammatory cytokines: IL-10 and  
365 IL-4.

366 Data are expressed as mean  $\pm$  SEM obtained in four independent donors. \*  $p < 0.05$  versus  
367 uninfected cells and # $p < 0.05$  versus A922500 treated cells.

368 **Fig 4. Lipid droplets is necessary for SARS-CoV-2 replication in VERO E6.**

369 VERO E6 were pre-treated with DGAT-1 inhibitor A922500 with different  
370 concentrations (0.1, 1, 10 and 50 $\mu$ M) for 2 hours before the infection with SARS-CoV-2  
371 with MOI of 0.01 for 24h.

372 (A) Viral replication was determinate by Plaque assay.

373 (B) Representative Plaque assay.

374 (C-E) Immunofluorescence analyses of VERO E6 after SARS-CoV-2 infection with MOI  
375 of 0.01 for 48h. (C) The virus was detected by indirect immunofluorescence using  
376 convalescent donor serum (Red or white) or (E) the double strain RNA was detected by  
377 indirect immunofluorescence by J2 antibody (Red), the lipid droplets were stained with  
378 BODIPY 493/503 (Green) and nuclei stained with DAPI (Blue).

379 (C' and E') Representative zoom images.

380 Data are expressed of four independent experiments for SARS-CoV-2 replication and  
381 three for immunofluorescent analyse. #p <0.05 versus A922500 treated cells. Scale bar  
382 20µm.

383 **Fig S1. SARS-CoV-2 induces an increase of the LD biogenesis in different human**  
384 **pulmonary cell lines.**

385 Human pulmonary cell lines were infected with SARS-CoV-2 at MOI of 0.01 for 48h.

386 (A and C) LDs were captured by fluorescent microscopy after Oil Red O staining (Red)  
387 and nuclei stained with DAPI (Blue).

388 (B and D) LDs were evaluated by ImageJ software analysis by the measurement of the  
389 fluorescent area.

390 Data are expressed of three independent experiments. \*p <0.05 versus uninfected cells.

391 Scale bar 20µm.

392

## 393 **Methodology**

394 **Cells, virus and reagents.** Blood were obtained from COVID-19 RT-PCR-confirmed  
395 patients and health volunteers. Human monocytes were isolated from peripheral blood  
396 mononuclear cells (PBMCs) using density gradient centrifugation (Ficoll-Paque, GE  
397 Healthcare). The PBMC were resuspended in PBS containing 1 mM EDTA and 2 % fetal  
398 bovine serum (FBS; GIBCO) to the concentration of  $10^8$  cells/mL. The cells were  
399 incubated with anti-CD14 antibodies (1:10) for 10 min and magnetic beads-conjugates  
400 (1:20) for additional 10 min, followed by magnetic recovery of monocytes for 5 min.  
401 Recovered monocytes were resuspended in PBS containing 1 mM EDTA and 2 % FBS  
402 and subjected to two more rounds of selection in the magnet according to the  
403 manufacturer's instructions (Human CD14+ selection kit, Easy Sep; StemCell). The  
404 purity of monocyte preparations (>98% CD14+ cells) was confirmed through flow  
405 cytometry.

406 Human primary monocyte was obtained through plastic adherence of PBMCs. Briefly,  
407 PBMCs were isolated by Ficoll-Paque from peripheral blood or from buff-coat  
408 preparations of healthy donors. PBMCs ( $2 \times 10^6$ ) were plated onto 48-well plates in low  
409 glucose Dulbecco's modified Eagle's medium (DMEM; GIBCO). After 2 hours of the  
410 plaque, non-adherent cells were washed out and the remaining monocytes were  
411 maintained for 24 hours in DMEM containing 5% inactivated male human AB serum  
412 (HS; Merck) and 100 U/mL penicillin-streptomycin (P/S; GIBCO) at 37 °C in 5 % CO<sub>2</sub>.  
413 The purity of human monocytes was above 90 %, as analyzed by flow cytometry analysis  
414 (FACScan; Becton Dickinson) using anti-CD3 (BD Biosciences) and anti-CD16  
415 (Southern Biotech) monoclonal antibodies.

416 Human lung epithelial carcinoma line (A549 - ATCC/CCL-185) and African green  
417 monkey kidney (Vero subtype E6) were cultured in high glucose DMEM supplemented  
418 with 10% FBS and 100 U/mL P/S, and were incubated at 37 °C in 5 % CO<sub>2</sub>.

419 Human lung microvascular endothelial line (HMVEC-L - LONZA/CC-2527) was  
420 maintained following the manufacturer's instructions. The cells were cultured in  
421 endothelial growth medium (EGM<sup>TM</sup>-2MV BulletKit<sup>TM</sup>, Clonetics) supplemented with 5  
422 % fetal bovine serum (FBS, Clonetics) and cells were incubated at 37 °C and 5 % CO<sub>2</sub>.

423 SARS-CoV-2 was originally isolated from nasopharyngeal swabs of confirmed case from  
424 Rio de Janeiro/Brazil (GenBank accession no. MT710714). The virus was amplified in  
425 Vero E6 cells in high glucose DMEM supplemented with 2% FBS, incubated at 37°C in  
426 5% CO<sub>2</sub> during 2 to 4 days of infection. Virus titers were performed by the tissue culture  
427 infectious dose at 50% (TCID<sub>50</sub>/mL) and the virus stocks kept in -80 °C freezers.  
428 According to WHO guidelines, all procedures involving virus culture were performed in  
429 biosafety level 3 (BSL3) multiuser facility.

430 **Infections and virus titration.** After 24h of cell plating, the SARS-CoV-2 infections  
431 were performed at MOI of 0.01 in all cells analyzed with or without pre-treatment for two  
432 hours with pharmacological inhibitor of the enzyme DGAT-1 (A922500 – Sigma CAS  
433 959122-11-3). The Plaque-forming Assay were performed for virus titration, the VERO  
434 E6 were seeded in 24-well plates and infected the monolayer cells with different dilutions  
435 of the supernatant containing virus for 1h at 37°C. The cells were overlaid with high  
436 glucose DMEM containing 2% FSB and 2.4% carboxymethylcellulose. After 3 days, the  
437 cells were fixed with 10% formaldehyde in PBS for 3h. The monolayer cells were stained  
438 with 0.04% solution of crystal violet in 20% ethanol for 1h. The titer was calculated from  
439 the count of the plaques formed in the wells corresponding to the dilution and the unit  
440 expressed in plaque forming unit per mL (PFU/mL).

441

442 **Lipid droplet staining.** Human primary monocytes, A549 cell line, and HMVEC cell  
443 line were seeded in coverslips. The cells infected or not were fixed using 3.7%  
444 formaldehyde. In addition, after isolation, the monocytes from COVID-19 patients were  
445 fixed using 3.7% formaldehyde and adhered in coverslips through cytopsin (500 x g for  
446 5 min). The LDs were stained with 0.3% Oil Red O (diluted in 60% isopropanol) for  
447 2 min at room temperature. The coverslips were mounted in slides using an antifade  
448 mounting medium (VECTASHIELD®). Nuclear recognition was based on DAPI staining  
449 (1 µg/mL) for 5 min. Fluorescence was analyzed by fluorescence microscopy with an  
450 100x objective lens (Olympus, Tokyo, Japan). The numbers of LDs were automatically  
451 quantified by ImageJ software analysis from 15 aleatory fields.

452

453 **Immunofluorescence staining.** VERO E6 cells were seeded in coverslips and after 48h  
454 were fixed using 3.7% formaldehyde. Cells were rinsed three times with PBS containing  
455 0.1 M CaCl<sub>2</sub> and 1 M MgCl<sub>2</sub> (PBS/CM) and then permeabilized with 0.1% Triton X-100



456 plus 0.2% BSA in PBS/CM for 10 min (PBS/CM/TB). Cells were stained with  
457 convalescent serum from a patient to identify with COVID-19 at 1:500 dilution for  
458 overnight, followed by a human anti-IgG-Alexa 546 at 1:1000 dilution for 1 h. The  
459 double-RNA was labeling by mouse monoclonal antibody J2 clone - Scicons (Schönborn  
460 et al., 1991) at 1:500 dilution for overnight, followed by a mouse anti-IgG-Dylight 550  
461 at 1:1000 dilution for 1h. LDs were stained with BODIPY493/503 dye (dilution 1:5000  
462 in water) for 5 min. The coverslips were mounted in slides using an antifade mounting  
463 medium (VECTASHIELD®). Nuclear recognition was based on DAPI staining  
464 (1 µg/mL) for 5 min. Fluorescence was analyzed by fluorescence microscopy with an  
465 100x objective lens (Olympus, Tokyo, Japan) or Confocal Microscopy (Laser scanning  
466 microscopy LSM710 Meta, Zeiss).

467 **SDS-page and Western blot.** After 24h of SARS-CoV-2 infection, monocytes were  
468 harvested using ice-cold lysis buffer (1% Triton X-100, 2% SDS, 150 mM de NaCl,  
469 10 mM de Hepes, 2 mM de EDTA plus protease inhibitor cocktail). Cell lysates were  
470 heated at 100 °C for 5 min in the presence of loading buffer (20% β-mercaptoethanol;  
471 370 mM Tris base; 160 µM bromophenol blue; 6% glycerol; 16% SDS; pH 6.8). 20 µg of  
472 protein/sample were resolved by electrophoresis on 10% polyacrylamide SDS-PAGE.  
473 After electrophoresis, the separated proteins were transferred to nitrocellulose membranes  
474 and incubated in blocking buffer (5% nonfat milk, 50 mM Tris-HCl, 150 mM NaCl, and  
475 0.1% Tween 20). Membranes were probed overnight with the following antibodies: anti-  
476 PPARγ (Santa Cruz Biotechnology, #SC-7196 - H100), anti-CD36 (Proteintech-18836-  
477 1-AP), anti-SREBP-1 (Ab-28481), anti-DGAT-1 (Santa Cruz Biotechnology, #SC-  
478 271934) and anti-β-actin (Sigma, #A1978). After the washing steps, they were incubated  
479 with IRDye - LICOR or HRP-conjugated secondary. All antibodies were diluted in  
480 blocking buffer. The detections were performed by Supersignal Chemiluminescence (GE  
481 Healthcare) or by fluorescence using the Odyssey system. The densitometries were  
482 analyzed using the software Image Studio Lite Ver 5.2.

483 **Measurement of viral RNA loads.** Supernatants from monocytes after 24h of SARS-  
484 CoV-2 infection were quantified for viral replication by detection of viral RNA.  
485 According to manufacturer's protocols, the total RNA from each sample was extracted  
486 using QIAamp Viral RNA (Qiagen®). Quantitative RT-PCR was performed using  
487 QuantiTect Probe RT-PCR Kit (Quiagen®) in a StepOne™ Real-Time PCR System  
488 (Thermo Fisher Scientific). Amplifications were carried out containing 2× reaction mix

489 buffer, 50  $\mu$ M of each primer, 10  $\mu$ M of probe, and 5  $\mu$ L of RNA template in 15  $\mu$ L  
490 reaction mixtures. Primers, probes, and cycling conditions recommended by the Centers  
491 for Disease Control and Prevention (CDC) protocol were used to detect the SARS-CoV-  
492 2 (CDC, 2020). For virus quantification was employed the standard curve method. Cells  
493 of each sample were counted before the PCR analyses for normalization. The Ct values  
494 for this target were compared to those obtained to different cell amounts,  $10^7$  to  $10^2$ , for  
495 calibration.

496 **Measurements of inflammatory mediators and LDH activity.** After 24 hours of  
497 SARS-CoV-2 infection, the monocyte supernatant with or without pre-treatment with  
498 A922500 in a concentration of 10  $\mu$ M was obtained. Cytokines and chemokines were  
499 measured in the supernatant by ELISA following the manufacturer's instructions (Duo  
500 set, R&D). LTB<sub>4</sub> and cysLT were measured in the supernatant by EIA (Cayman  
501 Chemicals) following the manufacturer's instructions. Cell death was determined  
502 according to the activity of lactate dehydrogenase (LDH) in the culture supernatants using  
503 a CytoTox® Kit (Promega, USA) according to the manufacturer's instructions.

504 **Ethics statement.** Experimental procedures involving human cells from healthy donors  
505 were performed with samples obtained after written informed consent and were approved  
506 by the Institutional Review Board (IRB) of the Oswaldo Cruz Foundation/Fiocruz (Rio  
507 de Janeiro, RJ, Brazil) under the number 397-07. Experimental procedures involving  
508 human patient cells were performed with samples obtained after written informed consent  
509 from all participants or patients' representatives and were approved by the National  
510 Review Board approved the study protocol (CONEP 30650420.4.1001.0008).

511 **Statistical analysis.** Data are expressed as mean  $\pm$  standard error of the mean (SEM) at  
512 least of three and maximum of five independent healthy donors. The paired two-tailed *t*-  
513 test was used to evaluate the significance of the two groups. Multiple comparisons among  
514 three or more groups were performed by one-way ANOVA followed by Tukey's multiple  
515 comparison test. *p* values  $< 0.05$  were considered statistically significant when compared  
516 SARS-CoV-2 infection to the uninfected control (\*) group or SARS-CoV-2 infection  
517 with A922500 treat group (#).

## 518 References

- 519 Abrantes, J.L., Alves, C.M., Costa, J., Almeida, F.C., Sola-Penna, M., Fontes, C.F., and Souza, T.M.  
520 (2012). Herpes simplex type 1 activates glycolysis through engagement of the enzyme 6-  
521 phosphofructo-1-kinase (PFK-1). *Biochim Biophys Acta* 1822, 1198-1206.
- 522 Almeida, P.E., Roque, N.R., Magalhaes, K.G., Mattos, K.A., Teixeira, L., Maya-Monteiro, C.,  
523 Almeida, C.J., Castro-Faria-Neto, H.C., Ryffel, B., Quesniaux, V.F., *et al.* (2014). Differential TLR2  
524 downstream signaling regulates lipid metabolism and cytokine production triggered by  
525 *Mycobacterium bovis* BCG infection. *Biochim Biophys Acta* 1841, 97-107.
- 526 Berre, S., Gaudin, R., Cunha de Alencar, B., Desdouits, M., Chabaud, M., Naffakh, N., Rabaza-  
527 Gairi, M., Gobert, F.X., Jouve, M., and Benaroch, P. (2013). CD36-specific antibodies block  
528 release of HIV-1 from infected primary macrophages and its transmission to T cells. *J Exp Med*  
529 210, 2523-2538.
- 530 Boulant, S., Targett-Adams, P., and McLauchlan, J. (2007). Disrupting the association of hepatitis  
531 C virus core protein with lipid droplets correlates with a loss in production of infectious virus. *J*  
532 *Gen Virol* 88, 2204-2213.
- 533 Bozza, P.T., Bakker-Abreu, I., Navarro-Xavier, R.A., and Bandeira-Melo, C. (2011). Lipid body  
534 function in eicosanoid synthesis: an update. *Prostaglandins Leukot Essent Fatty Acids* 85, 205-  
535 213.
- 536 Bozza, P.T., and Viola, J.P. (2010). Lipid droplets in inflammation and cancer. *Prostaglandins*  
537 *Leukot Essent Fatty Acids* 82, 243-250.
- 538 Camus, G., Herker, E., Modi, A.A., Haas, J.T., Ramage, H.R., Farese, R.V., and Ott, M. (2013).  
539 Diacylglycerol acyltransferase-1 localizes hepatitis C virus NS5A protein to lipid droplets and  
540 enhances NS5A interaction with the viral capsid core. *J Biol Chem* 288, 9915-9923.
- 541 Carvalho, F.A., Carneiro, F.A., Martins, I.C., Assuncao-Miranda, I., Faustino, A.F., Pereira, R.M.,  
542 Bozza, P.T., Castanho, M.A., Mohana-Borges, R., Da Poian, A.T., *et al.* (2012). Dengue virus capsid  
543 protein binding to hepatic lipid droplets (LD) is potassium ion dependent and is mediated by LD  
544 surface proteins. *J Virol* 86, 2096-2108.
- 545 CDC (2020). Centers for Disease Control and Prevention, Coronavirus Disease 2019 (COVID-19)  
546 (<https://www.cdc.gov/coronavirus/2019-ncov/lab/rt-pcr-panel-primerprobes.html>).
- 547 Chazal, N., and Gerlier, D. (2003). Virus entry, assembly, budding, and membrane rafts. *Microbiol*  
548 *Mol Biol Rev* 67, 226-237, table of contents.
- 549 Cheng, J.J., Li, J.R., Huang, M.H., Ma, L.L., Wu, Z.Y., Jiang, C.C., Li, W.J., Li, Y.H., Han, Y.X., Li, H.,  
550 *et al.* (2016). CD36 is a co-receptor for hepatitis C virus E1 protein attachment. *Sci Rep* 6, 21808.
- 551 Cheung, W., Gill, M., Esposito, A., Kaminski, C.F., Courousse, N., Chwetzoff, S., Trugnan, G.,  
552 Keshavan, N., Lever, A., and Desselberger, U. (2010). Rotaviruses associate with cellular lipid  
553 droplet components to replicate in viroplasm, and compounds disrupting or blocking lipid  
554 droplets inhibit viroplasm formation and viral replication. *J Virol* 84, 6782-6798.
- 555 Chitraju, C., Mejhert, N., Haas, J.T., Diaz-Ramirez, L.G., Grueter, C.A., Imbriglio, J.E., Pinto, S.,  
556 Koliwad, S.K., Walther, T.C., and Farese, R.V. (2017). Triglyceride Synthesis by DGAT1 Protects  
557 Adipocytes from Lipid-Induced ER Stress during Lipolysis. *Cell Metab* 26, 407-418.e403.
- 558 Codo, A.C., Davanzo, G.G., Monteiro, L.B., de Souza, G.F., Muraro, S.P., Virgilio-da-Silva, J.V.,  
559 Prodonoff, J.S., Carregari, V.C., de Biagi Junior, C.A.O., Crunfli, F., *et al.* (2020). Elevated Glucose  
560 Levels Favor SARS-CoV-2 Infection and Monocyte Response through a HIF-1 $\alpha$ /Glycolysis-  
561 Dependent Axis. *Cell Metab*.
- 562 Coffey, C.M., Sheh, A., Kim, I.S., Chandran, K., Nibert, M.L., and Parker, J.S. (2006). Reovirus outer  
563 capsid protein micro1 induces apoptosis and associates with lipid droplets, endoplasmic  
564 reticulum, and mitochondria. *J Virol* 80, 8422-8438.
- 565 Coperchini, F., Chiovato, L., Croce, L., Magri, F., and Rotondi, M. (2020). The cytokine storm in  
566 COVID-19: An overview of the involvement of the chemokine/chemokine-receptor system.  
567 *Cytokine Growth Factor Rev* 53, 25-32.

- 568 Febbraio, M., Hajjar, D.P., and Silverstein, R.L. (2001). CD36: a class B scavenger receptor  
569 involved in angiogenesis, atherosclerosis, inflammation, and lipid metabolism. *J Clin Invest* *108*,  
570 785-791.
- 571 Filipe, A., and McLauchlan, J. (2015). Hepatitis C virus and lipid droplets: finding a niche. *Trends*  
572 *Mol Med* *21*, 34-42.
- 573 Fintelman-Rodrigues, N., Sacramento, C.Q., Lima, C.R., da Silva, F.S., Ferreira, A.C., Mattos, M.,  
574 de Freitas, C.S., Soares, V.C., Gomes Dias, S.d.S., Temerozo, J.R., *et al.* (2020). Atazanavir inhibits  
575 SARS-CoV-2 replication and pro-inflammatory cytokine production. *bioRxiv*,  
576 2020.2004.2004.020925.
- 577 Gao, R., Bhatnagar, J., Blau, D.M., Greer, P., Rollin, D.C., Denison, A.M., Deleon-Carnes, M.,  
578 Shieh, W.J., Sambhara, S., Tumpey, T.M., *et al.* (2013). Cytokine and chemokine profiles in lung  
579 tissues from fatal cases of 2009 pandemic influenza A (H1N1): role of the host immune response  
580 in pathogenesis. *Am J Pathol* *183*, 1258-1268.
- 581 Herker, E., Harris, C., Hernandez, C., Carpentier, A., Kaehlcke, K., Rosenberg, A.R., Farese, R.V.,  
582 and Ott, M. (2010). Efficient hepatitis C virus particle formation requires diacylglycerol  
583 acyltransferase-1. *Nat Med* *16*, 1295-1298.
- 584 Herker, E., and Ott, M. (2012). Emerging role of lipid droplets in host/pathogen interactions. *J*  
585 *Biol Chem* *287*, 2280-2287.
- 586 Laufman, O., Perrino, J., and Andino, R. (2019). Viral Generated Inter-Organelle Contacts  
587 Redirect Lipid Flux for Genome Replication. *Cell* *178*, 275-289.e216.
- 588 Lee, J.Y., Cortese, M., Haselmann, U., Tabata, K., Romero-Brey, I., Funaya, C., Schieber, N.L.,  
589 Qiang, Y., Bartenschlager, M., Kallis, S., *et al.* (2019). Spatiotemporal Coupling of the Hepatitis C  
590 Virus Replication Cycle by Creating a Lipid Droplet- Proximal Membranous Replication  
591 Compartment. *Cell Rep* *27*, 3602-3617.e3605.
- 592 Lu, R., Zhao, X., Li, J., Niu, P., Yang, B., Wu, H., Wang, W., Song, H., Huang, B., Zhu, N., *et al.*  
593 (2020). Genomic characterisation and epidemiology of 2019 novel coronavirus: implications for  
594 virus origins and receptor binding. *Lancet* *395*, 565-574.
- 595 Lyn, R.K., Hope, G., Sherratt, A.R., McLauchlan, J., and Pezacki, J.P. (2013). Bidirectional lipid  
596 droplet velocities are controlled by differential binding strengths of HCV core DII protein. *PLoS*  
597 *One* *8*, e78065.
- 598 Martín-Acebes, M.A., Blázquez, A.B., Jiménez de Oya, N., Escribano-Romero, E., and Saiz, J.C.  
599 (2011). West Nile virus replication requires fatty acid synthesis but is independent on  
600 phosphatidylinositol-4-phosphate lipids. *PLoS One* *6*, e24970.
- 601 Meroni, L., Giacomet, V., Morelli, P., Erba, P., Galazzi, M., Riva, A., Viganò, A., and Galli, M.  
602 (2005). Increased CD36 expression in vertically human immunodeficiency virus-infected children  
603 unrelated to antiretroviral therapy. *Pediatr Infect Dis J* *24*, 576-577.
- 604 Miyanari, Y., Atsuzawa, K., Usuda, N., Watashi, K., Hishiki, T., Zayas, M., Bartenschlager, R.,  
605 Wakita, T., Hijikata, M., and Shimotohno, K. (2007). The lipid droplet is an important organelle  
606 for hepatitis C virus production. *Nat Cell Biol* *9*, 1089-1097.
- 607 Novoa, R.R., Calderita, G., Arranz, R., Fontana, J., Granzow, H., and Risco, C. (2005). Virus  
608 factories: associations of cell organelles for viral replication and morphogenesis. *Biol Cell* *97*,  
609 147-172.
- 610 Pereira-Dutra, F.S., Teixeira, L., de Souza Costa, M.F., and Bozza, P.T. (2019). Fat, fight, and  
611 beyond: The multiple roles of lipid droplets in infections and inflammation. *J Leukoc Biol* *106*,  
612 563-580.
- 613 Peschke, T., Bender, A., Nain, M., and Gems, D. (1993). Role of macrophage cytokines in  
614 influenza A virus infections. *Immunobiology* *189*, 340-355.
- 615 Samsa, M.M., Mondotte, J.A., Iglesias, N.G., Assuncao-Miranda, I., Barbosa-Lima, G., Da Poian,  
616 A.T., Bozza, P.T., and Gamarnik, A.V. (2009). Dengue virus capsid protein usurps lipid droplets  
617 for viral particle formation. *PLoS Pathog* *5*, e1000632.

618 Schönborn, J., Oberstrass, J., Breyel, E., Tittgen, J., Schumacher, J., and Lukacs, N. (1991).  
619 Monoclonal antibodies to double-stranded RNA as probes of RNA structure in crude nucleic acid  
620 extracts. *Nucleic Acids Res* *19*, 2993-3000.

621 Shen, B., Yi, X., Sun, Y., Bi, X., Du, J., Zhang, C., Quan, S., Zhang, F., Sun, R., Qian, L., *et al.* (2020).  
622 Proteomic and Metabolomic Characterization of COVID-19 Patient Sera. *Cell* *182*, 59-72.e15.

623 Souza-Moreira, L., Soares, V.C., Dias, S.D.S.G., and Bozza, P.T. (2019). Adipose-derived  
624 Mesenchymal Stromal Cells Modulate Lipid Metabolism and Lipid Droplet Biogenesis via  
625 AKT/mTOR -PPAR $\gamma$  Signalling in Macrophages. *Sci Rep* *9*, 20304.

626 Syed, G.H., Amako, Y., and Siddiqui, A. (2010). Hepatitis C virus hijacks host lipid metabolism.  
627 *Trends Endocrinol Metab* *21*, 33-40.

628 Takahashi, T., and Suzuki, T. (2011). Function of membrane rafts in viral lifecycles and host  
629 cellular response. *Biochem Res Int* *2011*, 245090.

630 Temerozo, J.R., Sacramento, C.Q., Fintelman-Rodrigues, N., Pãõ, C.R.R., de Freitas, C.S., da Silva  
631 Gomes Dias, S., Ferreira, A.C., Mattos, M., Soares, V.C., Teixeira, L., *et al.* (2020). The  
632 neuropeptides VIP and PACAP inhibit SARS-CoV-2 replication in monocytes and lung epithelial  
633 cells, decrease the production of proinflammatory cytokines, and VIP levels are associated with  
634 survival in severe Covid-19 patients. *bioRxiv*, 2020.2007.2025.220806.

635 Viktorova, E.G., Nchoutmboube, J.A., Ford-Siltz, L.A., Iverson, E., and Belov, G.A. (2018).  
636 Phospholipid synthesis fueled by lipid droplets drives the structural development of poliovirus  
637 replication organelles. *PLoS Pathog* *14*, e1007280.

638 Villareal, V.A., Rodgers, M.A., Costello, D.A., and Yang, P.L. (2015). Targeting host lipid synthesis  
639 and metabolism to inhibit dengue and hepatitis C viruses. *Antiviral Res* *124*, 110-121.

640 Wu, F., Zhao, S., Yu, B., Chen, Y.M., Wang, W., Song, Z.G., Hu, Y., Tao, Z.W., Tian, J.H., Pei, Y.Y.,  
641 *et al.* (2020). A new coronavirus associated with human respiratory disease in China. *Nature* *579*,  
642 265-269.

643 Yang, W., Hood, B.L., Chadwick, S.L., Liu, S., Watkins, S.C., Luo, G., Conrads, T.P., and Wang, T.  
644 (2008). Fatty acid synthase is up-regulated during hepatitis C virus infection and regulates  
645 hepatitis C virus entry and production. *Hepatology* *48*, 1396-1403.

646 Yuan, S., Chu, H., Chan, J.F., Ye, Z.W., Wen, L., Yan, B., Lai, P.M., Tee, K.M., Huang, J., Chen, D.,  
647 *et al.* (2019). SREBP-dependent lipidomic reprogramming as a broad-spectrum antiviral target.  
648 *Nat Commun* *10*, 120.

649 Zhang, J., Lan, Y., and Sanyal, S. (2017). Modulation of Lipid Droplet Metabolism-A Potential  
650 Target for Therapeutic Intervention in. *Front Microbiol* *8*, 2286.

651 Zhou, F., Yu, T., Du, R., Fan, G., Liu, Y., Liu, Z., Xiang, J., Wang, Y., Song, B., Gu, X., *et al.* (2020a).  
652 Clinical course and risk factors for mortality of adult inpatients with COVID-19 in Wuhan, China:  
653 a retrospective cohort study. *Lancet* *395*, 1054-1062.

654 Zhou, P., Yang, X.L., Wang, X.G., Hu, B., Zhang, L., Zhang, W., Si, H.R., Zhu, Y., Li, B., Huang, C.L.,  
655 *et al.* (2020b). A pneumonia outbreak associated with a new coronavirus of probable bat origin.  
656 *Nature* *579*, 270-273.

657 Zhu, N., Zhang, D., Wang, W., Li, X., Yang, B., Song, J., Zhao, X., Huang, B., Shi, W., Lu, R., *et al.*  
658 (2020). A Novel Coronavirus from Patients with Pneumonia in China, 2019. *N Engl J Med* *382*,  
659 727-733.

660

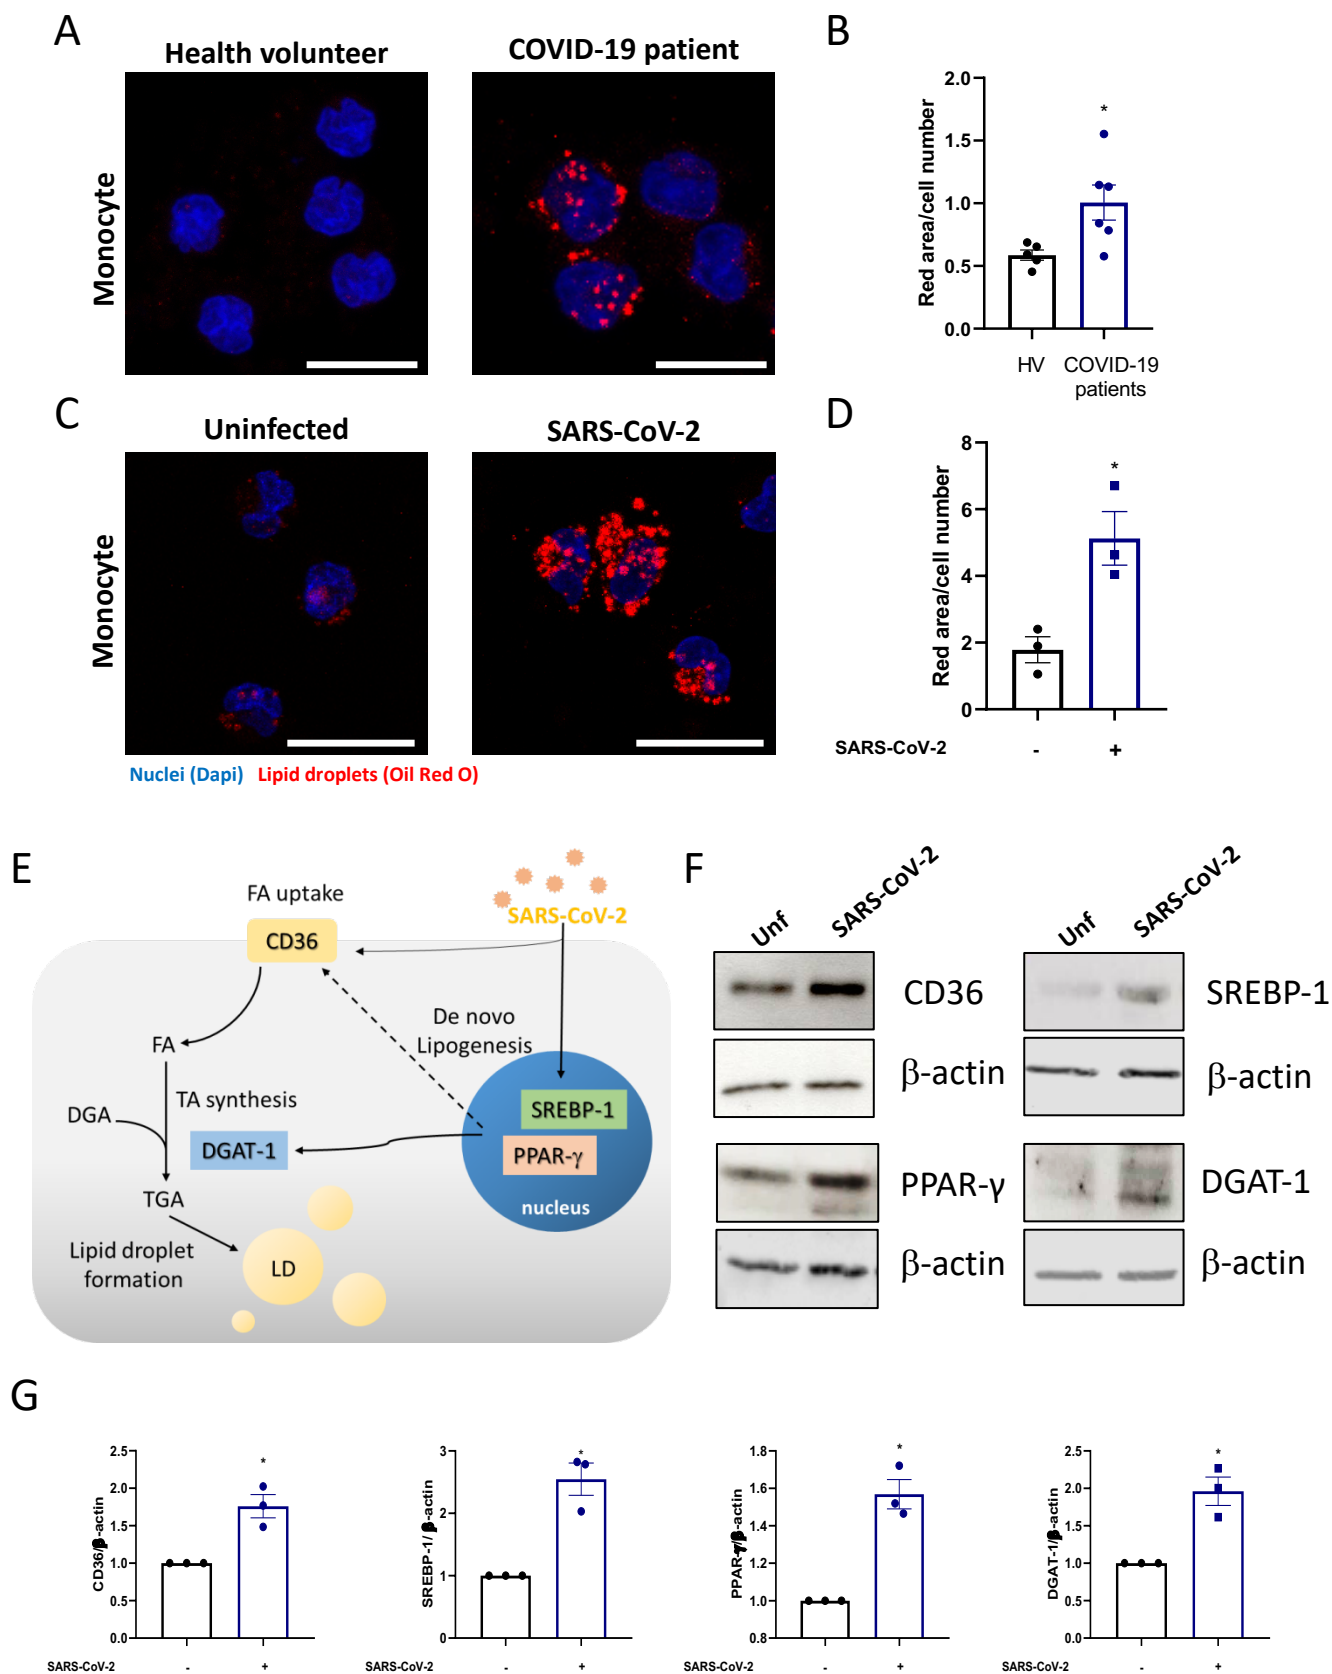

Figure 1

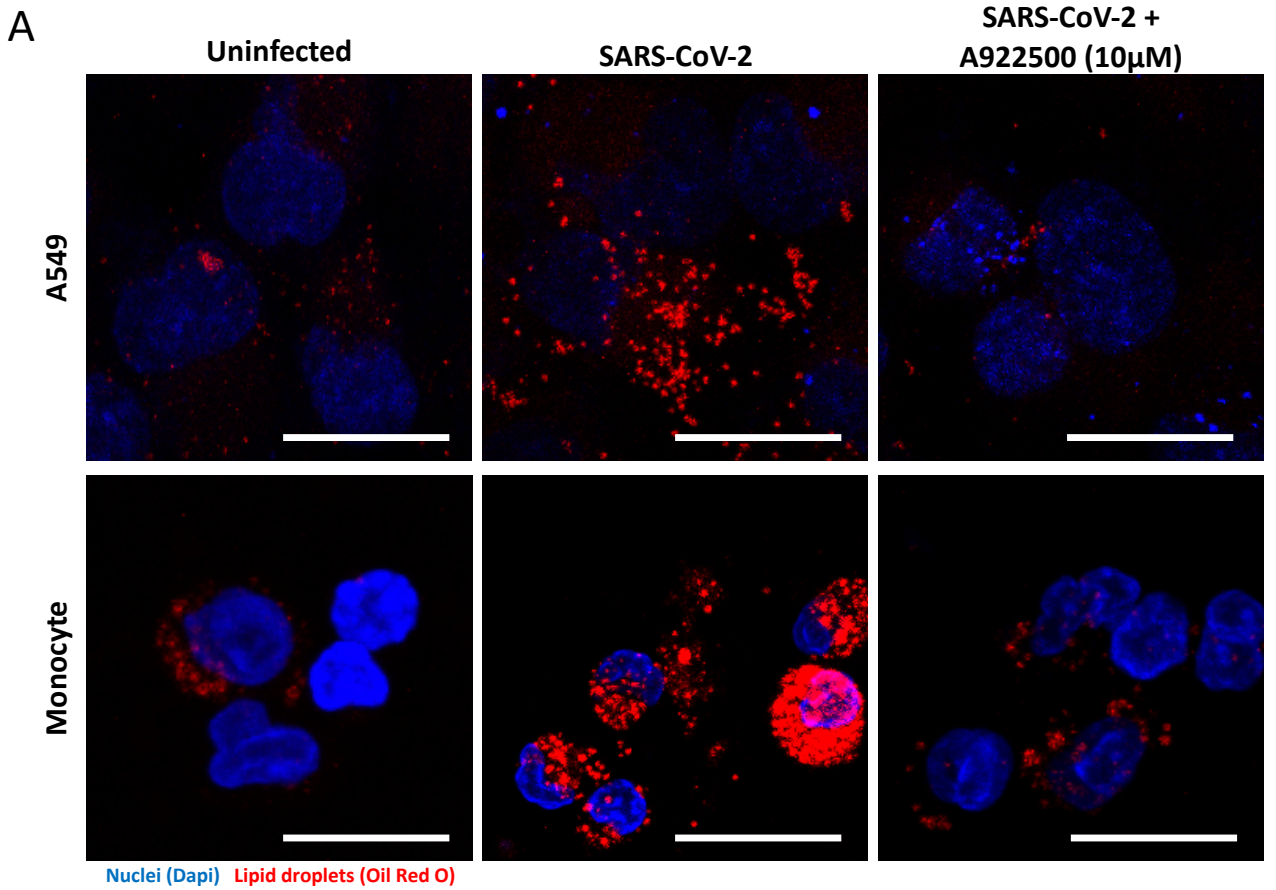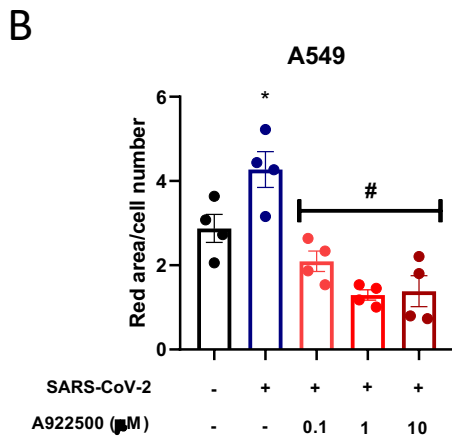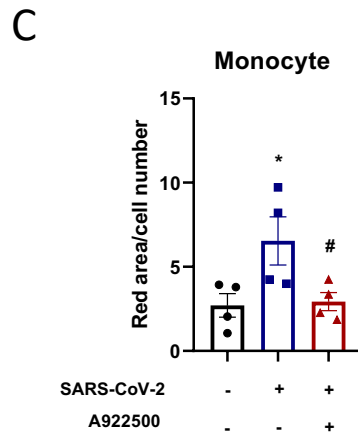

Figure 2

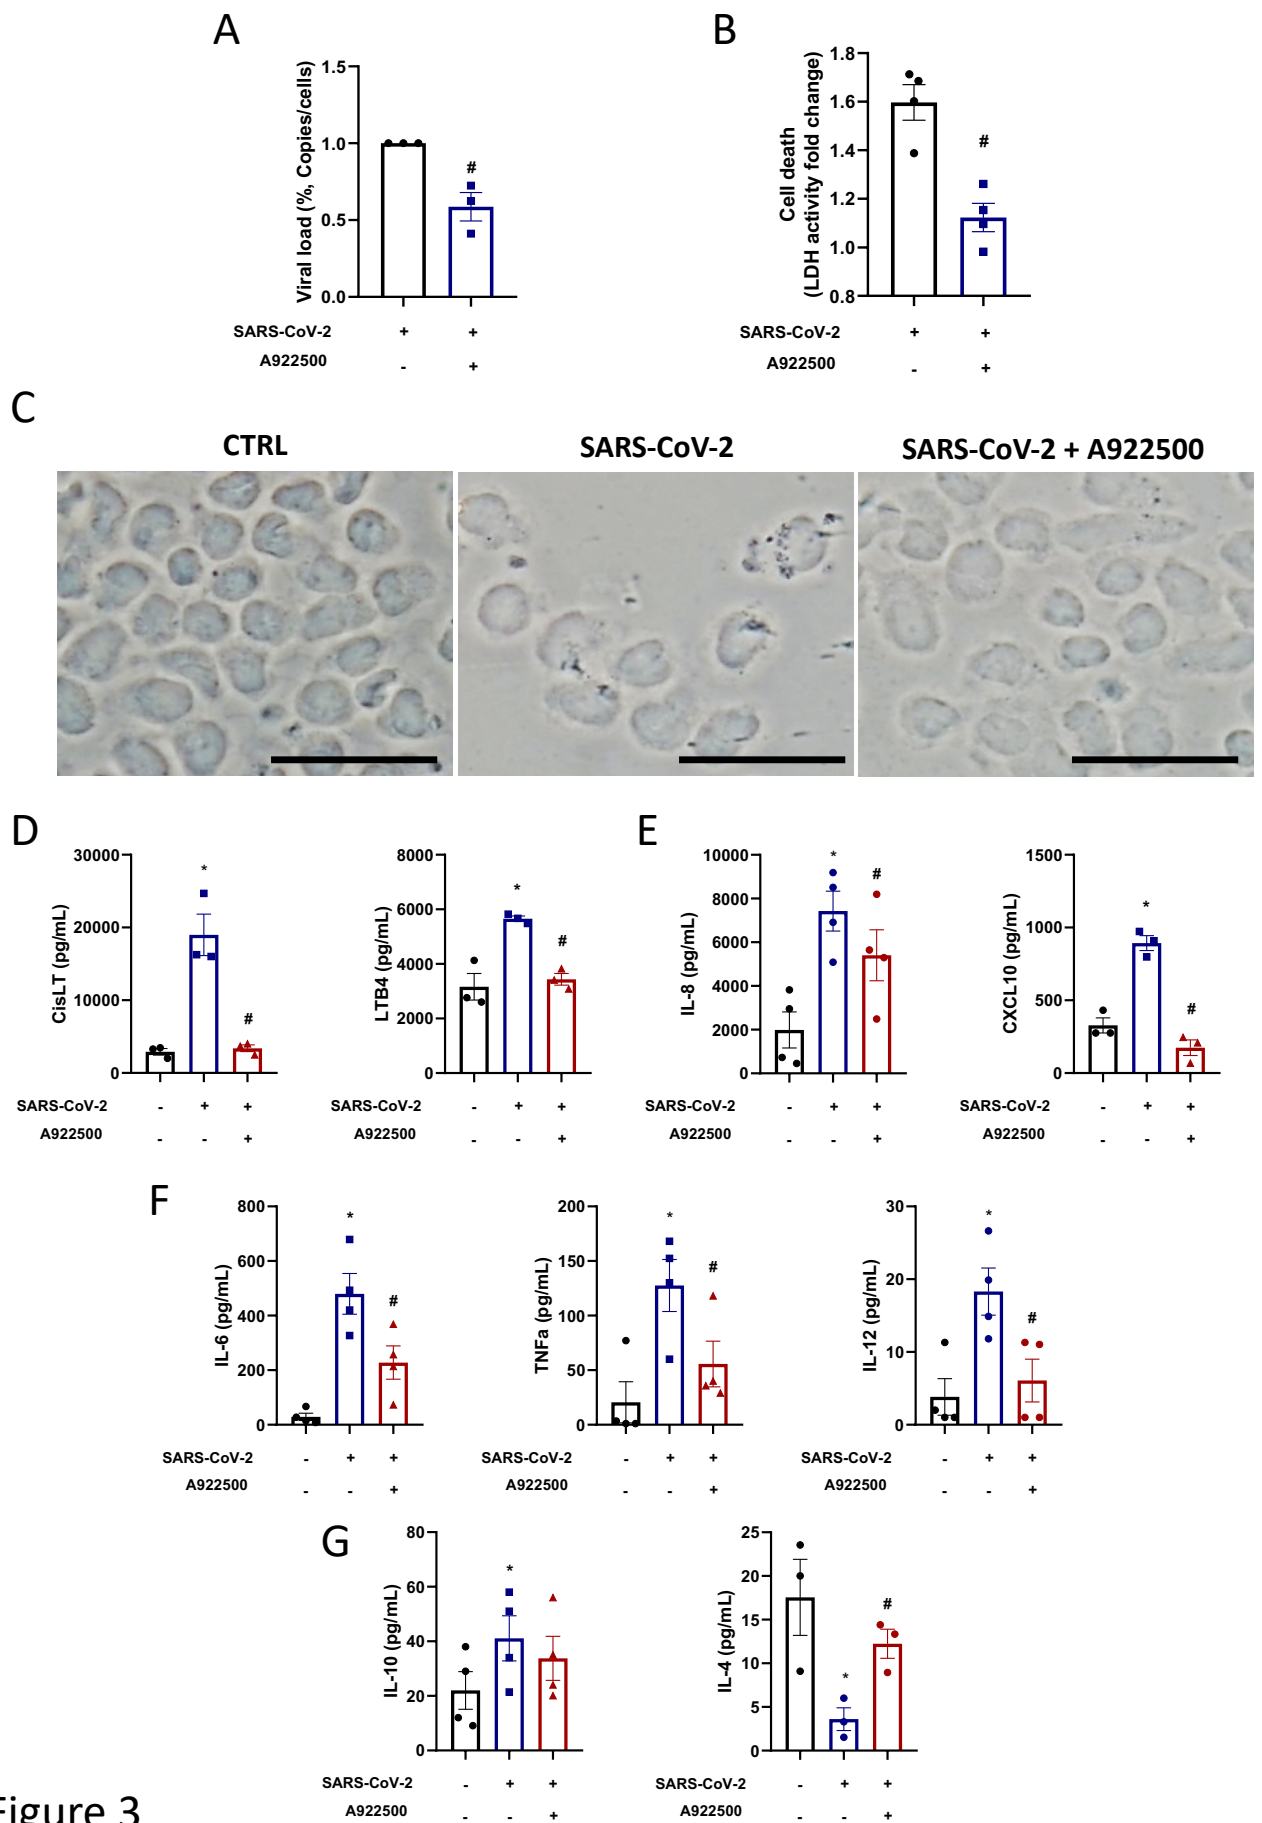

Figure 3



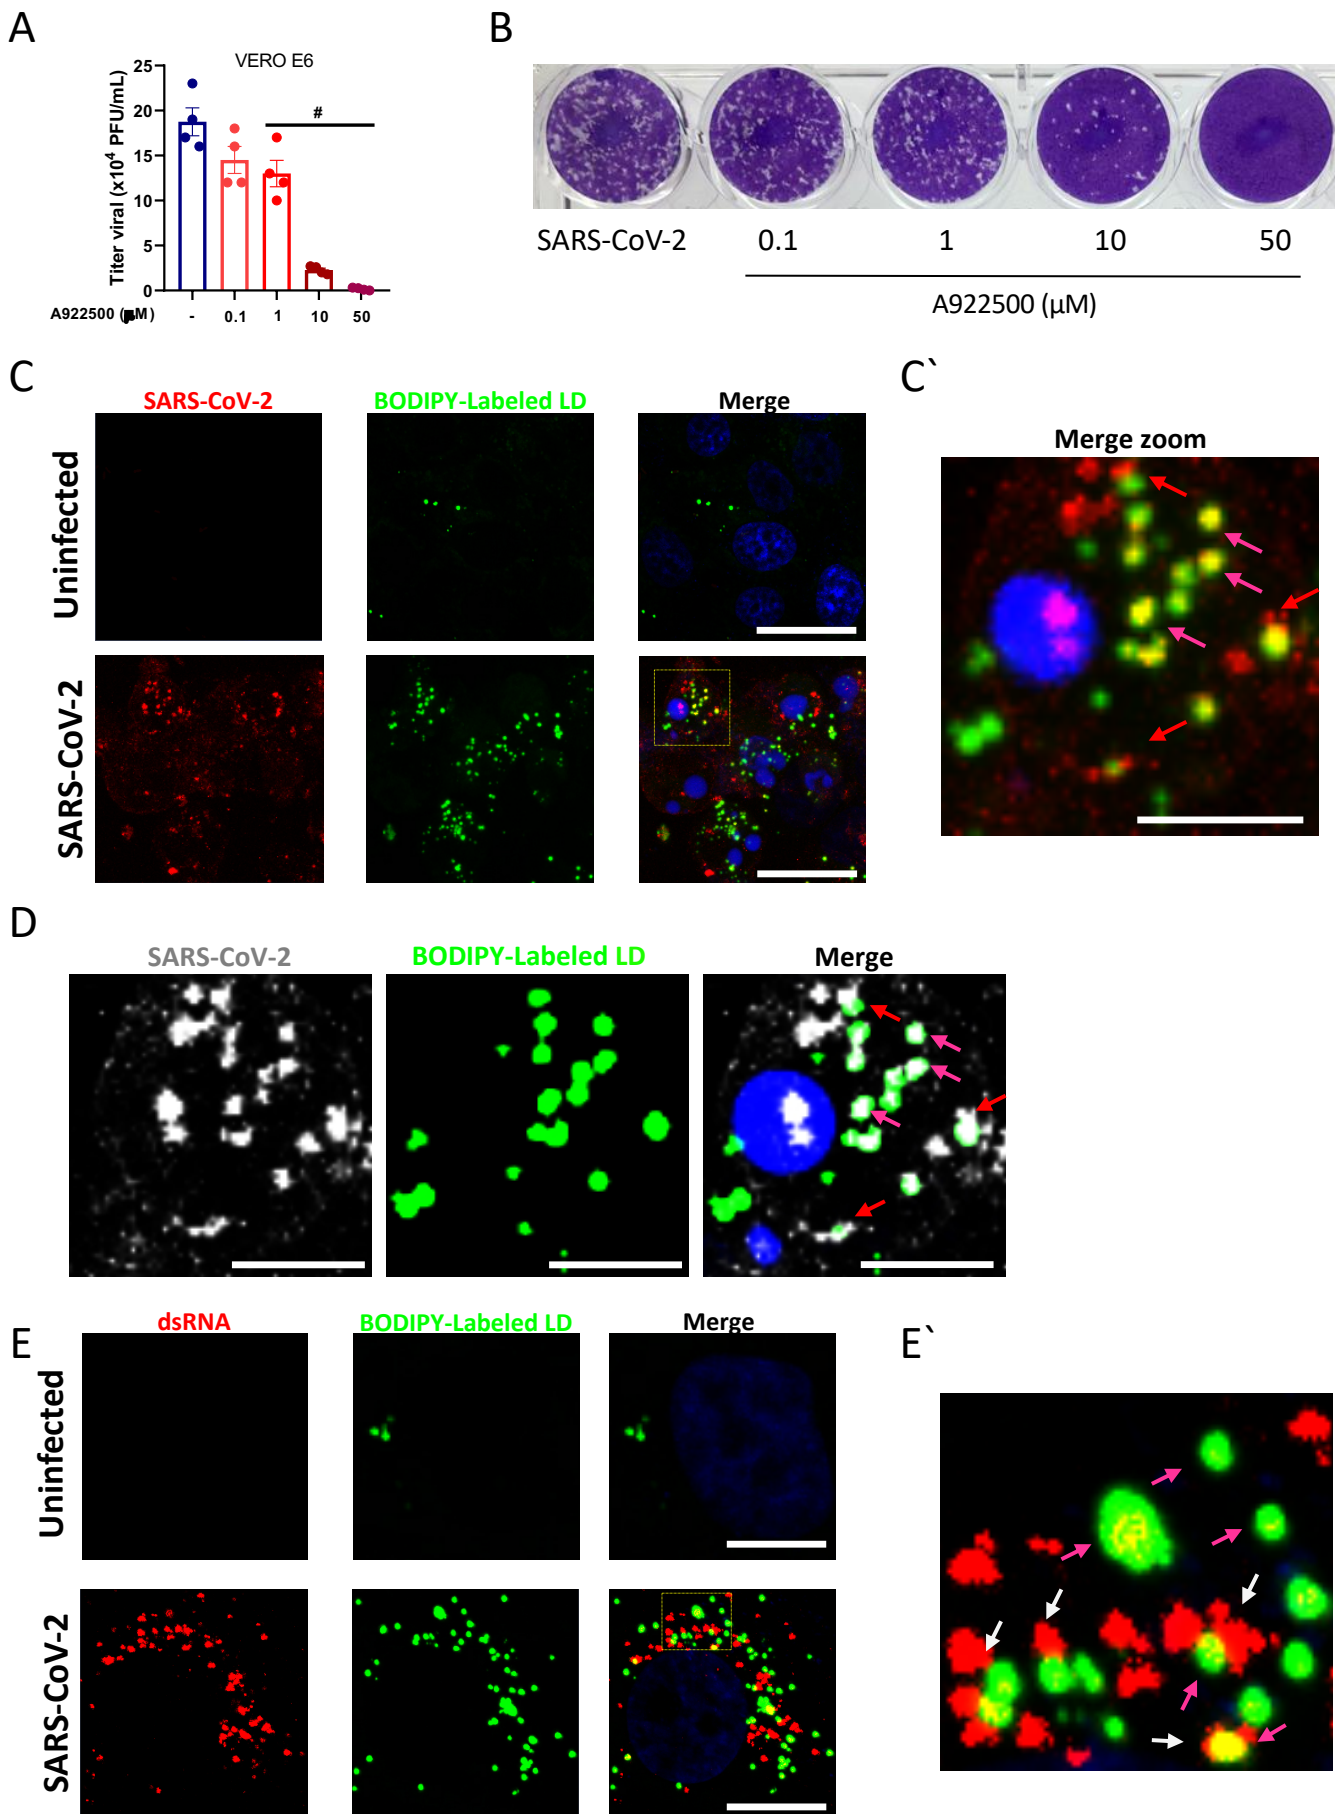

Figure 4

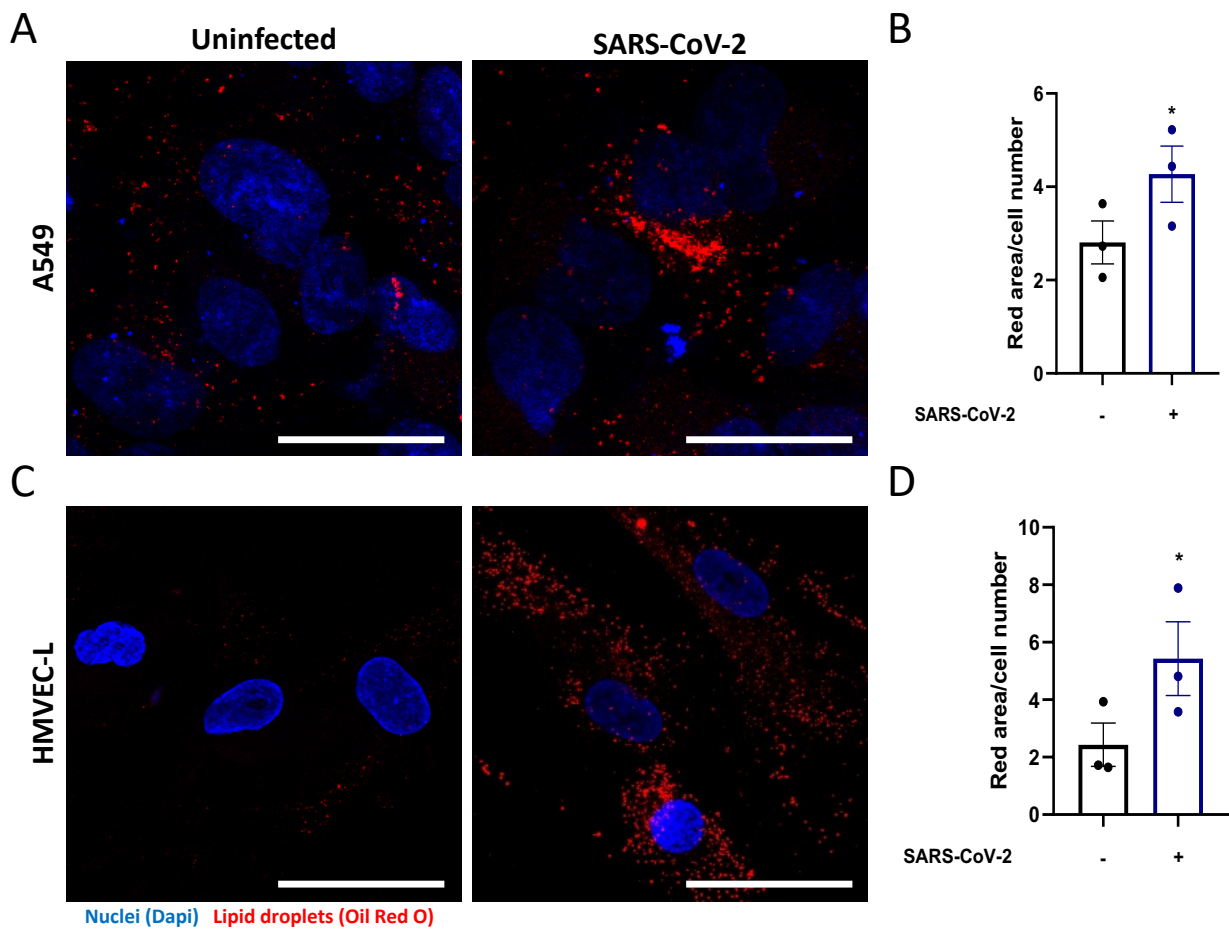

Source: https://biorxiv.org/content/10.1101/2020.08.22.262733v1.full.pdf
